# Supplementary material for: Oxidation of methane to methanol over Pd@Pt nanoparticles under mild conditions in water
Source: Royal Society of Chemistry journal article supplement (doi:10.1039/d1cy00273b), 2021-01-01
Supplement: d1cy00273b1.pdf [file d1cy00273b1.pdf]

## Supporting Information

### **Oxidation of Methane to Methanol over Pd@Pt Nanoparticles under Mild Conditions in Water**

Jianjun Chen <sup>a,b,†</sup>, Sikai Wang <sup>a,c,†</sup>, Laurent Peres<sup>c</sup>, Vincent Collière<sup>d</sup>, Karine Philippot<sup>e</sup>, Pierre Lecante<sup>d</sup>, Yaoqiang Chen<sup>b\*</sup>, Ning Yan<sup>a\*</sup>

<sup>a</sup> Department of Chemical and Biomolecular, National University of Singapore, 4 Engineering Drive, Singapore 117585, Singapore, E-mail: [ning.yan@nus.edu.sg](mailto:ning.yan@nus.edu.sg)

<sup>b</sup> Institute of New Energy and Low-carbon Technology, Sichuan University, Chengdu 610064, China, E-mail: [chenyaoqiang@scu.edu.cn](mailto:chenyaoqiang@scu.edu.cn)

<sup>c</sup> Joint School of National University of Singapore and Tianjin University, International Campus of Tianjin University, Binhai New City, Fuzhou 350207, China.

<sup>d</sup> CNRS, LCC (Laboratoire de Chimie de Coordination), 205 route de Narbonne, BP44099, F-31077 Toulouse Cedex 4, France.

<sup>e</sup> .CNRS, CEMES (Centre d'Élaboration des Matériaux et d'Études Structurales), 29 Rue Jeanne-Marvig, BP 4347, F-31055 Toulouse Cedex 4, France.

† These authors contributed equally to this work

Table S1. Blank reactions performed in order to attest of the carbon source

| Entry | Samples   | CH <sub>4</sub> pressure<br>(bar) | Products(μmol)      |                    |      |       |                 |
|-------|-----------|-----------------------------------|---------------------|--------------------|------|-------|-----------------|
|       |           |                                   | CH <sub>3</sub> OOH | CH <sub>3</sub> OH | HCHO | HCOOH | CO <sub>2</sub> |
| 1     | PVP       | 0                                 | 0                   | 0                  | 0    | 0     | -               |
| 2     | PVP       | 30                                | 0                   | 0                  | 0    | 0     | -               |
| 3     | Pd@Pt-PVP | 0                                 | 0                   | 0                  | 0    | 0     | -               |
| 4     | Pd@Pt-PVP | 30                                | 4.4                 | 2.3                | 0.3  | 0     | 0.3             |

Reaction conditions: 400 μmol H<sub>2</sub>O<sub>2</sub>, 50 °C for 0.5 h, 800 rpm

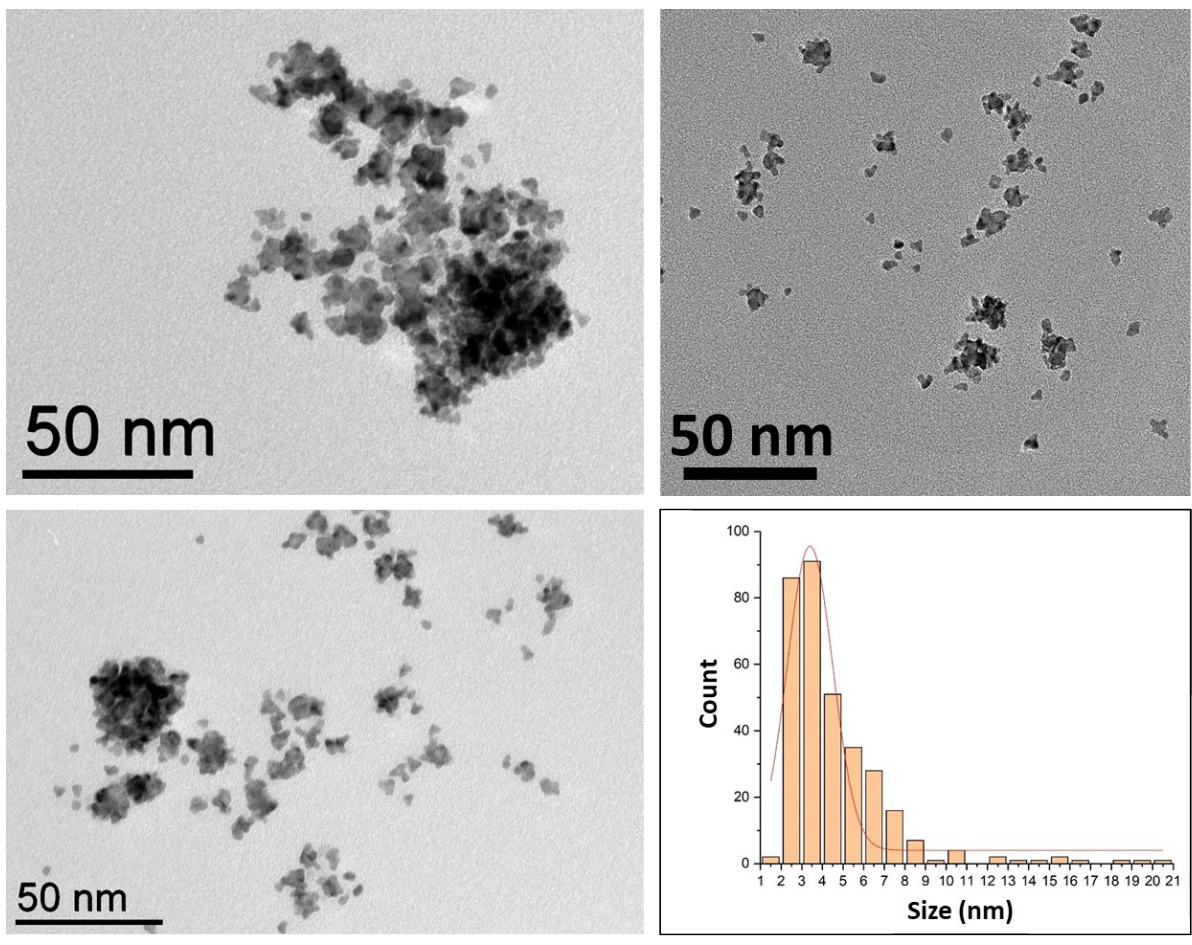

**Figure S1.** TEM images and size distribution of Pd@Pt NPs (mean size=  $3.4 \pm 2.2$ nm).

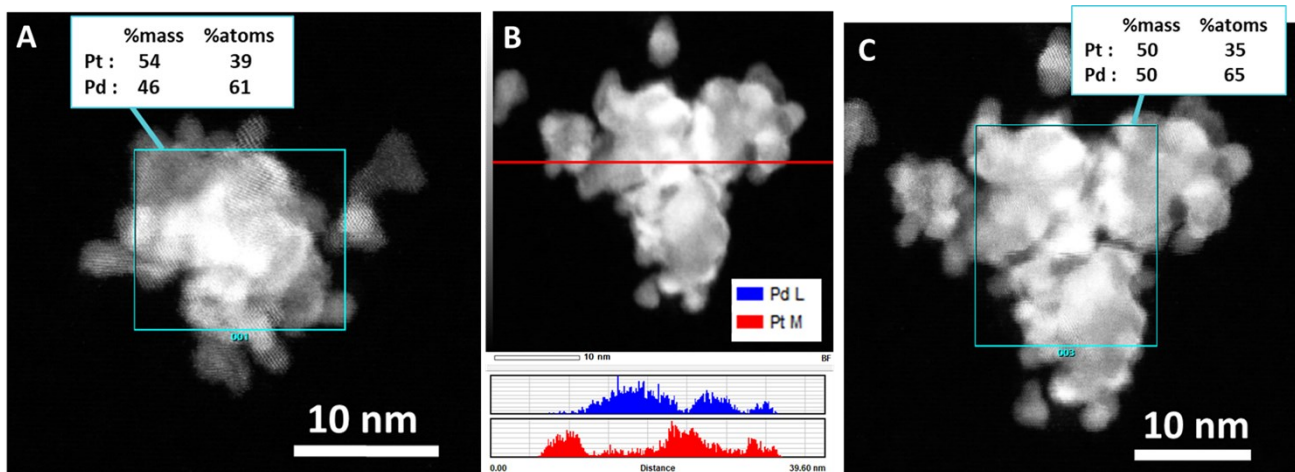

**Figure S2:** A. and C. STEM-EDX elemental analysis of aggregates of NPs with the corresponding elemental Pd and Pt compositions, and B. STEM-EDX line analysis of the aggregate presented in A., with the Pd (blue) and Pt (red) distribution along the line.

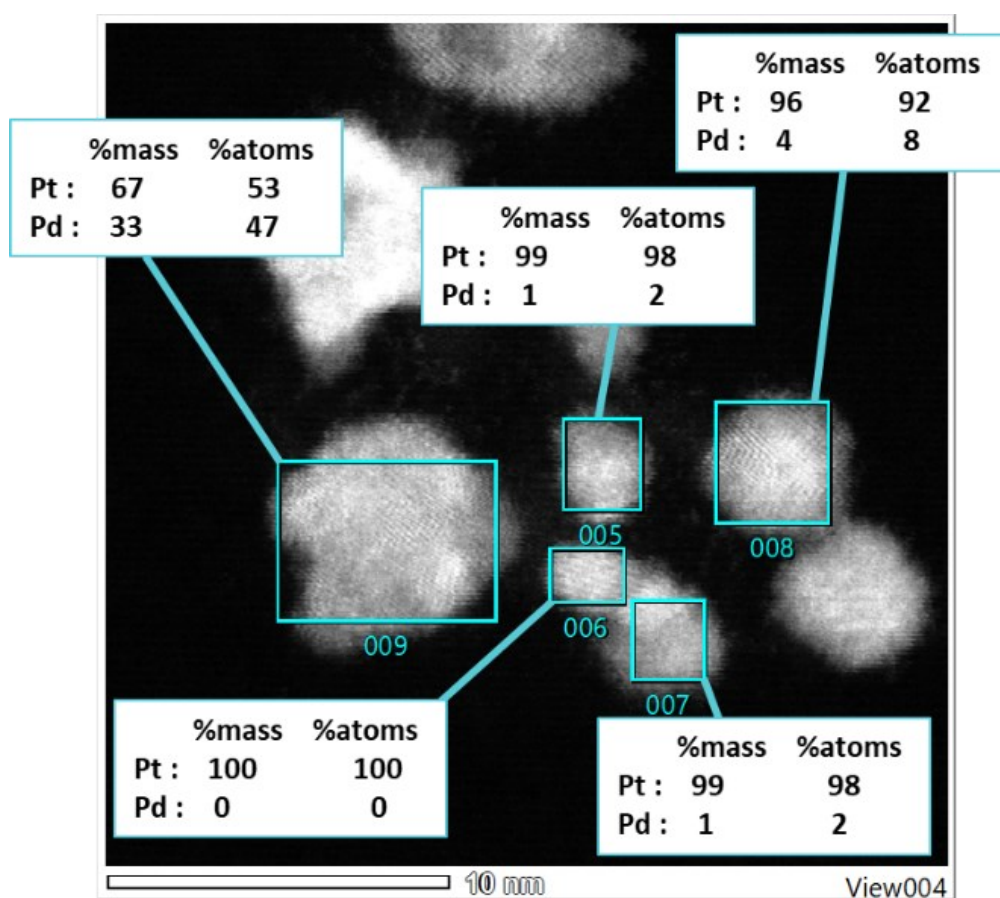

**Figure S3:** STEM-EDX elemental analysis of different type of particles, with the elemental Pd and Pt composition.

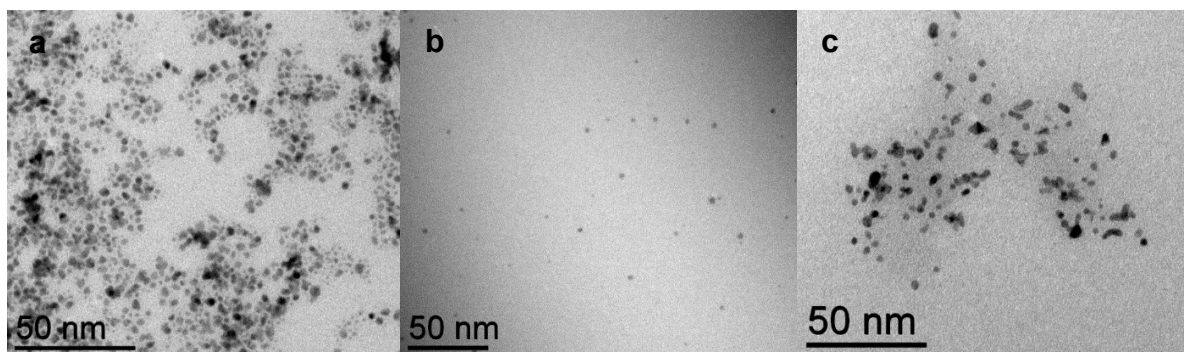

**Figure S4.** TEM images of Pt, Pd and PtPd(molar ratio=1:1) colloid nanoparticles. The mean sizes of the particles are  $2.1\pm 1.3$ ,  $2.1\pm 1.5$  and  $2.7\pm 1.2$  nm, respectively.

The core-shell Pd@Pt structure presents larger size (smaller specific surface area) than those of Pt, Pd and PdPt particles, while the productivity and primary oxygenate selectivity are larger. Thus, Pd@Pt should have better methane oxidation activity.

To quantify the inherent activity, turnover frequency (TOF) was further calculated by the following equation. The amount of surface metal elements is calculated from the average particle sizes observed by TEM (Figure S1). The results are listed in Table S2.

$$TOF = \frac{n_{oxygenate}}{n_{surface\ metal} \cdot t}$$

**Table S2.** Total oxygenate productivity and turnover frequency of Pd, Pt, Pd@Pt and PdPt nano colloid samples

|       | Total oxygenate productivity ( $\text{mol}_{oxygenate} \text{mol}_{metal}^{-1}$ ) | TOF ( $\text{mol}_{oxygenate} \text{mol}_{surf\ metal}^{-1} \text{h}^{-1}$ ) |
|-------|-----------------------------------------------------------------------------------|------------------------------------------------------------------------------|
| Pt    | 1.5                                                                               | 5.7                                                                          |
| Pd    | 4.5                                                                               | 17.0                                                                         |
| Pd@Pt | 7                                                                                 | 34.0                                                                         |
| PdPt  | 5.1                                                                               | 19.4                                                                         |

**Table S3.** Liquid-phase methane oxidation performance of other reported heterogeneous catalysts

|                                           | Temp. (°C) | Oxidants                      | Methanol Sel. | Primary oxygenate prod.                                    | Source    |
|-------------------------------------------|------------|-------------------------------|---------------|------------------------------------------------------------|-----------|
| Pd@Pt colloids                            | 50         | H <sub>2</sub> O <sub>2</sub> | 92.4%         | 89.3 mol kg <sub>Pd@Pt</sub> <sup>-1</sup> h <sup>-1</sup> | This work |
| AuPd/ZSM-5-R                              | 70         | O <sub>2</sub>                | 92%           | 91.6 mol kg <sub>AuPd</sub> <sup>-1</sup> h <sup>-1</sup>  | 1         |
| Au-Pd colloids                            | 60         | H <sub>2</sub> O <sub>2</sub> | 58%           | 43.4 mol kg <sub>AuPd</sub> <sup>-1</sup> h <sup>-1</sup>  | 2         |
| 0.13AuPd/TiO <sub>2</sub>                 | 50         | H <sub>2</sub> O <sub>2</sub> | 90.7%         | 0.614 mol kg <sub>cat</sub> <sup>-1</sup> h <sup>-1</sup>  | 3         |
| 0.3Rh/ZrO <sub>2</sub>                    | 70         | H <sub>2</sub> O <sub>2</sub> | 74%           | 12.4 mol kg <sub>Rh</sub> <sup>-1</sup> h <sup>-1</sup>    | 4         |
|                                           |            |                               |               | 0.037 mol kg <sub>cat</sub> <sup>-1</sup> h <sup>-1</sup>  |           |
| 0.6Rh/TiO <sub>2</sub>                    | 150        | CO and O <sub>2</sub>         | 100%          | 76.7 mol kg <sub>cat</sub> <sup>-1</sup> h <sup>-1</sup>   | 5         |
| SAs Rh-CeO <sub>2</sub><br>NWs (0.13 wt%) | 50         | H <sub>2</sub> O <sub>2</sub> | 93.9%         | 3.7 mol kg <sub>cat</sub> <sup>-1</sup> h <sup>-1</sup>    | 6         |
| Cr <sub>1</sub> /TiO <sub>2</sub>         | 50         | H <sub>2</sub> O <sub>2</sub> | 48%           | 2.09 mol kg <sub>cat</sub> <sup>-1</sup> h <sup>-1</sup>   | 7         |
| Fe-MFI zeolite                            | 50         | H <sub>2</sub> O <sub>2</sub> | 85%           | 9.50 mol kg <sub>cat</sub> <sup>-1</sup> h <sup>-1</sup>   | 8         |
| Pd <sub>x</sub> Cu <sub>1-x</sub> O/C     | 50         | H <sub>2</sub> O <sub>2</sub> | 93.9%         | 4.08 mol kg <sub>cat</sub> <sup>-1</sup> h <sup>-1</sup>   | 9         |
| FeN <sub>4</sub> /GN                      | 25         | H <sub>2</sub> O <sub>2</sub> | 41%           | 3.44 mol kg <sub>Fe</sub> <sup>-1</sup> h <sup>-1</sup>    | 10        |
|                                           |            |                               |               | 0.093 mol kg <sub>cat</sub> <sup>-1</sup> h <sup>-1</sup>  |           |

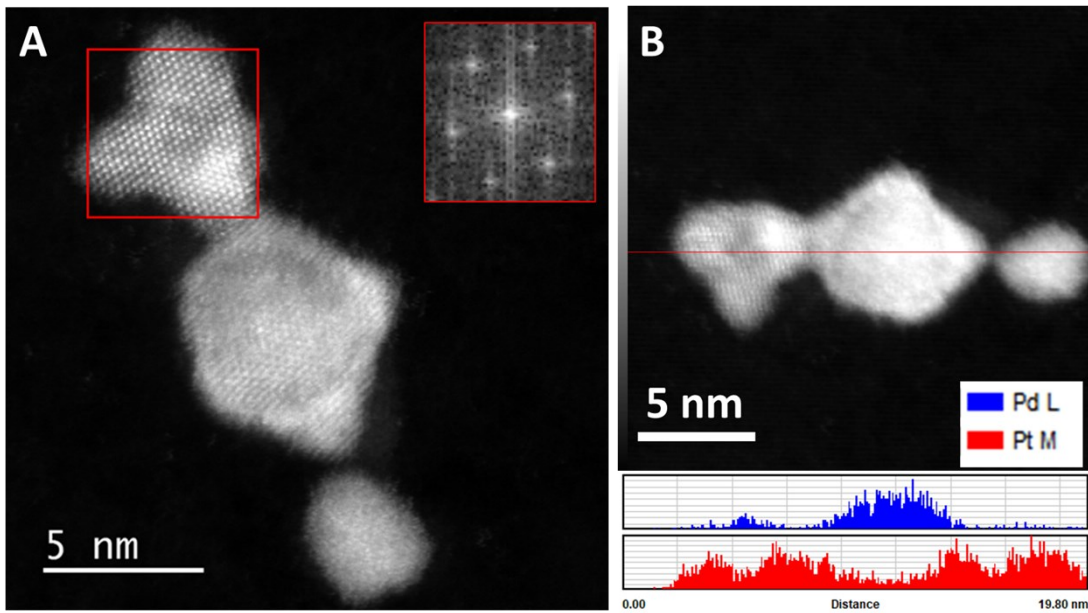

**Figure S5:** A. STEM-HREM dark field image of Pd@Pt NPs with the Fourier transform of the square red area in the inset and B. STEM-EDX line analysis of the same nanoparticles with the Pd (blue) and Pt (red) distribution along the line.

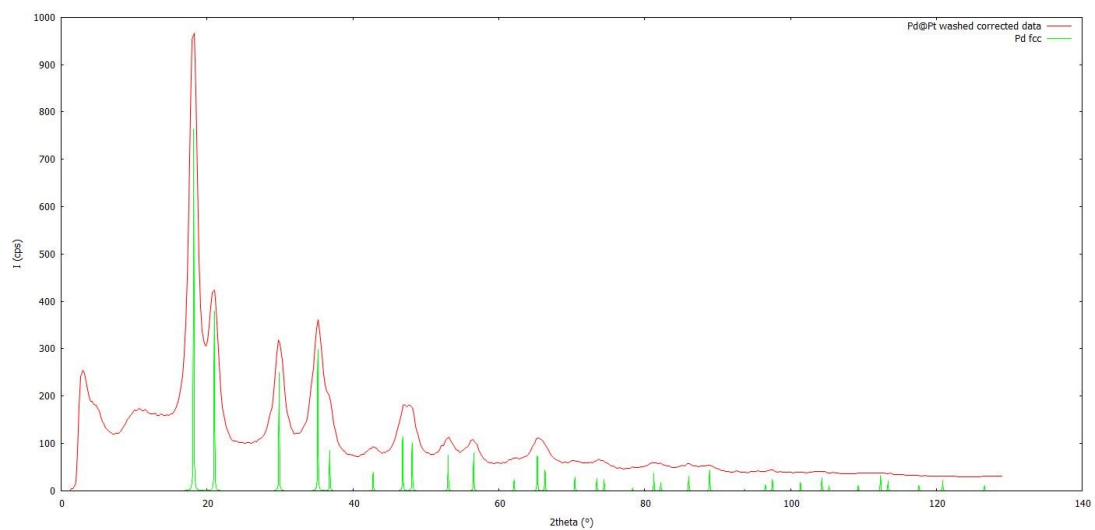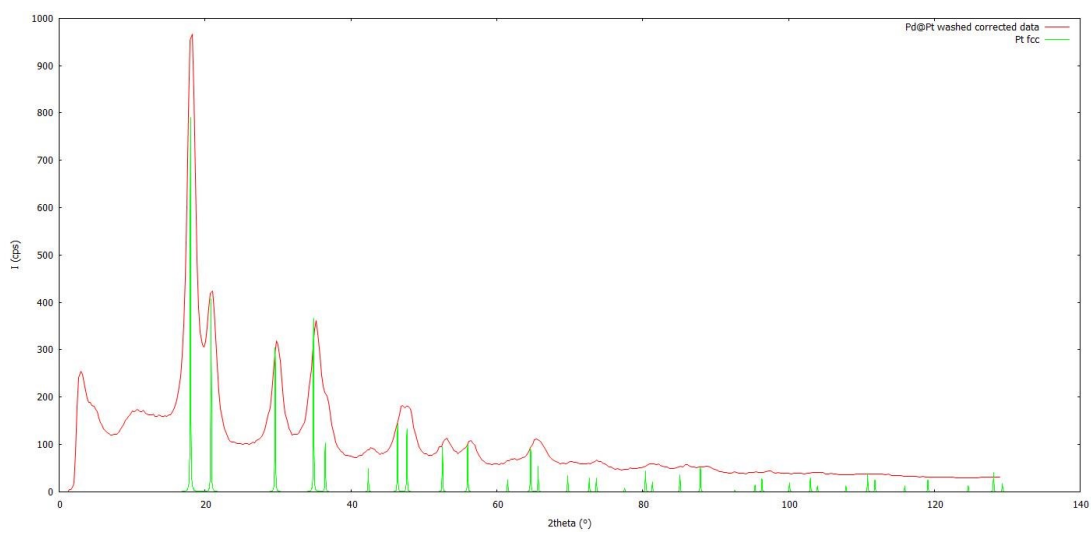

**Figure S6.** Comparison of WAXS patterns of the Pd@Pt colloid catalyst and pure Pd or pure Pt fcc structures



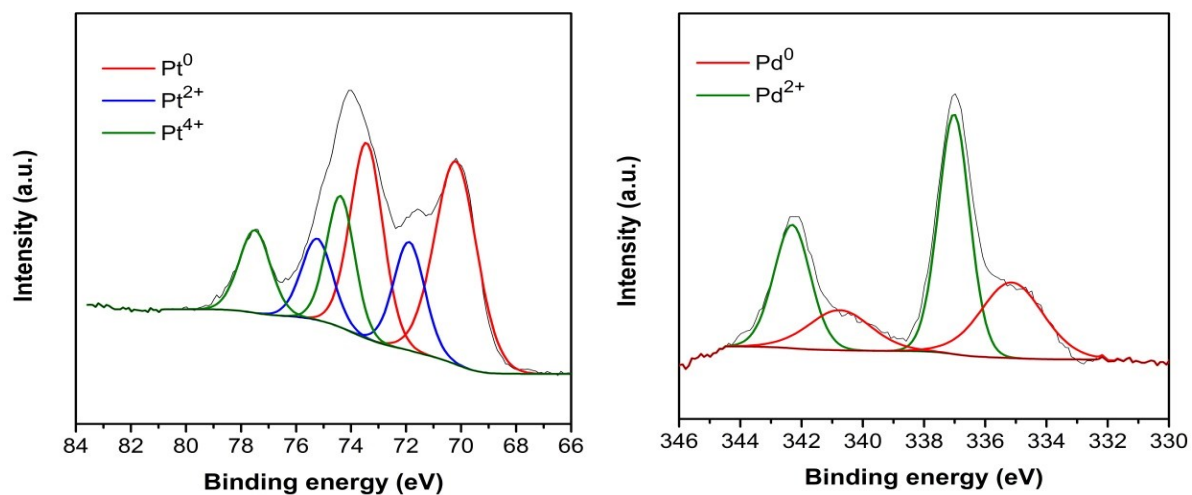

**Figure S7.** XPS spectra of Pd@Pt NPs showing Pt 4f and Pd 3d peaks.

The amount of surface Pt<sup>0</sup> and Pd<sup>0</sup> over Pd@Pt-PVP is 55% and 38%, respectively.

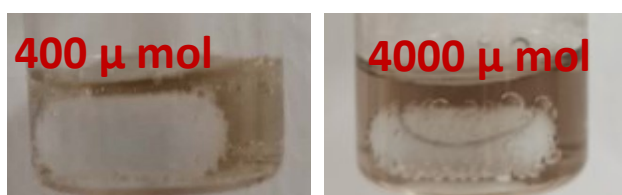

**Figure S8.** Pictures of the reaction mixture after  $\text{CH}_4$  oxidation at 400 and 4000  $\mu\text{mol H}_2\text{O}_2$ .

**Table S4.** H<sub>2</sub>O<sub>2</sub> consumption and gain factors of Pd, Pt, PtPd and Pd@Pt colloidal catalysts

| Catalyst | Consumed H <sub>2</sub> O <sub>2</sub> after 30 min reaction | Gain factor <sup>[a]</sup> |
|----------|--------------------------------------------------------------|----------------------------|
| Pd       | 100%                                                         | 0.011                      |
| PtPd     | 96%                                                          | 0.013                      |
| Pd@Pt    | 82%                                                          | 0.021                      |
| Pt       | 50%                                                          | 0.0075                     |

[a] Gain factor refers to the molar ratio between oxygenates produced and actual hydrogen peroxide consumed

**Table S5.** Scalability tests of the Pd@Pt colloid catalysts.

| Total volume | Primary oxygenate produced (mol mol <sub>metal</sub> <sup>-1</sup> ) |                     | Productivity (mol mol <sub>metal</sub> <sup>-1</sup> h <sup>-1</sup> ) |
|--------------|----------------------------------------------------------------------|---------------------|------------------------------------------------------------------------|
|              | CH <sub>3</sub> OH                                                   | CH <sub>3</sub> OOH |                                                                        |
| 2.4 ml       | 1.2                                                                  | 4.0                 | 10.5                                                                   |
| 9.6 ml       | 1.7                                                                  | 1.8                 | 7.1                                                                    |

The same reactor and same batch of catalysts were used. The total volume of the reactor is 30 ml.

**Table S6.** Remaining of H<sub>2</sub>O<sub>2</sub> with varied reaction times using Pd@Pt colloidal catalyst

| Reaction time                           | 10 min | 30 min | 80 min |
|-----------------------------------------|--------|--------|--------|
| H <sub>2</sub> O <sub>2</sub> remaining | 36%    | 18%    | 10%    |

**Table S7.** Comparison of the catalytic performance obtained with Fe-based Fenton's type catalyst and Pd@Pt colloids nanocatalyst

| Entry | Catalyst                 | Product amount ( $\mu\text{mol}$ ) |                        |               |                |               | Primary Oxygenated selectivity (%) |
|-------|--------------------------|------------------------------------|------------------------|---------------|----------------|---------------|------------------------------------|
|       |                          | $\text{CH}_3\text{OOH}$            | $\text{CH}_3\text{OH}$ | $\text{HCHO}$ | $\text{HCOOH}$ | $\text{CO}_2$ |                                    |
| 1     | Fe-Fenton <sup>[a]</sup> | 1.2                                | 0.1                    | 0.15          | 0              | 0.17          | 77                                 |
| 2     | Pd@Pt                    | 2.3                                | 4.4                    | 0.3           | 0              | 0.18          | 92                                 |

[a] The Fe-Fenton system is prepared using  $\text{Fe}(\text{NO}_3)_3 \cdot 9\text{H}_2\text{O}$  solution with the same amount of metal species as that for entry 2.

## References

1. Z. Jin, L. Wang, E. Zuidema, K. Mondal, M. Zhang, J. Zhang, C. Wang, X. Meng, H. Yang, C. Mesters and F.-S. Xiao, *Science*, 2020, **367**, 193-197.
2. R. McVicker, N. Agarwal, S. J. Freakley, Q. He, S. Althahban, S. H. Taylor, C. J. Kiely and G. J. Hutchings, *Catal. Today*, 2020, **342**, 32-38.
3. C. Williams, J. H. Carter, N. F. Dummer, Y. K. Chow, D. J. Morgan, S. Yacob, P. Serna, D. J. Willock, R. J. Meyer, S. H. Taylor and G. J. Hutchings, *ACS Catal.*, 2018, **8**, 2567-2576.
4. Y. Kwon, T. Y. Kim, G. Kwon, J. Yi and H. Lee, *J. Am. Chem. Soc.*, 2017, **139**, 17694-17699.
5. J. Shan, M. Li, L. F. Allard, S. Lee and M. Flytzani-Stephanopoulos, *Nature*, 2017, **551**, 605-608.
6. S. Bai, F. Liu, B. Huang, F. Li, H. Lin, T. Wu, M. Sun, J. Wu, Q. Shao, Y. Xu and X. Huang, *Nat. Commun.*, 2020, **11**, 954.
7. Q. K. Shen, C. Y. Cao, R. K. Huang, L. Zhu, X. Zhou, Q. H. Zhang, L. Gu and W. G. Song, *Angew. Chem. Int. Edit.*, 2020, **59**, 1216-1219.
8. P. Xiao, Y. Wang, T. Nishitoba, J. N. Kondo and T. Yokoi, *Chem Commun (Camb)*, 2019, **55**, 2896-2899.
9. S. Bai, Y. Xu, P. Wang, Q. Shao and X. Huang, *ACS Catal.*, 2019, **9**, 6938-6944.
10. X. Cui, H. Li, Y. Wang, Y. Hu, L. Hua, H. Li, X. Han, Q. Liu, F. Yang, L. He, X. Chen, Q. Li, J. Xiao, D. Deng and X. Bao, *Chem*, 2018, **4**, 1902-1910.
